# Supplementary material for: From Molecular Signal Activation to Locomotion: An Integrated, Multiscale Analysis of Cell Motility on Defined Matrices
Source: PLoS One. 2011 Mar 31;6(3):e18423. doi: 10.1371/journal.pone.0018423 (PMC3069105; doi:10.1371/journal.pone.0018423)
Supplement: Text S1 — Glossary of time-dependent variables and model constants. (DOC) [file pone.0018423.s004.doc]

**Text S1**

for

**“From molecular signal activation to locomotion: An integrated, multiscale analysis of cell motility on defined matrices”**

Amit Pathak and Sanjay Kumar

*Department of Bioengineering, University of California, Berkeley, CA, USA*

**Glossary of time-dependent variables and model constants**

**Table S1**: Independent time-dependent variables that comprise the dynamical system in our model (Eqs. 1-9 in the main manuscript).

| ***Symbol*** | ***Definition*** | ***Typical values*** | ***Model component*** |
| --- | --- | --- | --- |
|  | Rac activation level | 0 – 1 | Protrusion dynamics |
|  | Number of cell-ECM adhesion bonds | 0 – 104 | Adhesion dynamics |
|  | Net growth rate of protrusion adhesions | 0 – 0.1 s-1 | Protrusion dynamics |
|  | Rho activation level | 0 – 1 | Actomyosin contractility |
|  | Contractile force due to stress fibers | 0 – 15 nN | Actomyosin contractility |
|  | Displacement of cell centroid | 0 – 30 | Cell body migration |

**Table S2**: Additional parameters used to describe the model.

| ***Symbol*** | ***Definition*** | ***Typical values*** | ***Model component*** |
| --- | --- | --- | --- |
|  | Concentration of FA proteins accumulated per receptor-ligand bond | 0 – 1 | Adhesion dynamics |
|  | Bond stretch of receptor-ligand bonds | 0 – 20 nm | Adhesion dynamics |
|  | Stored potential energy per receptor-ligand bond | 0 – nN/μm | Adhesion dynamics |
|  | Growth rate of an adhesion cluster, due to formation of receptor-ligand bonds | 0 – 500 s-1 | Adhesion dynamics |
|  | Dissociation rate of an adhesion cluster, due to rupture of bonds | 0 – 5 s-1 | Adhesion dynamics |
|  | =, normalized values of adhesion size at front and rear adhesions | 0 – 1 | Adhesion dynamics |
|  | Contractile force generated by stress fibers | 0 – 15 nN | Actomyosin contractility |
|  | Contractile force sustained by stress fibers | 0 – 15 nN | Actomyosin contractility |
|  | Deformation of cell-ECM adhesion bonds | 0 – 10 nm | Actomyosin contractility |
|  | =, normalized values of tension generated by the stress fibers attached at front and rear adhesions | 0 – 1 | Actomyosin contractility |
|  | Net forward propulsive force | 0 – 15 nN | Cell body migration |
|  | Resistive drag force due to cell body adhesions | 0 – 5 nN | Cell body migration |
|  | Retraction period of the rear edge at steady state | 0 – 100 min | Cell body migration |
|  | Migration displacement of cell centroid per cycle | 0 – 10 | Cell body migration |
|  | Average migration speed = / | 0 – 30 | Cell body migration |

**Table S3**: Rate constants and proportionality constants used in the model.

| ***Symbol*** | ***Definition*** | ***Value*** | ***Model component*** |
| --- | --- | --- | --- |
|  | Maximum Rac activation level in the rear | 0.1 | Adhesion dynamics |
|  | Maximum number of bonds in an adhesion cluster | 104 | Adhesion dynamics |
|  | Elasticity constant of the receptor-ligand bond |  | Adhesion dynamics |
|  | Elasticity constant of the cell-ECM bond | 0 – 0.15 | Adhesion dynamics |
|  | Normalized ECM stiffness = | 0 – 1 | Adhesion dynamics |
|  | Elasticity constant of the FA proteins |  | Adhesion dynamics |
|  | Critical bond stretch of the receptor-ligand bond |  | Adhesion dynamics |
|  | Ligand density | 0 – 105 | Adhesion dynamics |
|  | ECM adhesivity = | 0 – 10 | Adhesion dynamics |
|  | Reference rate constant for receptor clustering |  | Adhesion dynamics |
|  | Rate constant for receptor-ligand bond dissociation |  | Adhesion dynamics |
|  | Constant intrinsic rate of adhesion formation at the filopodia |  | Protrusion dynamics |
|  | Rate constant for dissociation of protrusion adhesions due to membrane ruffles |  | Protrusion dynamics |
|  | Kinetic energy of membrane ruffles |  | Protrusion dynamics |
|  | Proportionality constant for Rac activation relation with protrusion formation |  | Protrusion dynamics |
|  | Maximum contractile force generated per actin-myosin motor |  | Actomyosin contractility |
|  | Equivalent stiffness constant of the cell-ECM bond |  | Actomyosin contractility |
|  | Passive elasticity constant of the stress fibers |  | Actomyosin contractility |
|  | Minimum possible value of Rho activation level assigned at t=0 | 0.1 | Actomyosin contractility |
|  | Rate constant for the forward rate of actomyosin contractility | 0.01 s-1 | Actomyosin contractility |
|  | Rate constant for the backward rate of actomyosin contractility | s-1 | Actomyosin contractility |
|  | Proportionality constant for Rho activation with rise in contractility |  | Actomyosin contractility |
|  | Rate constant for the dissociation of transient cell-ECM bonds dispersed over the cell body |  | Cell body migration |
|  | Frictional constant due to cell-body adhesions |  | Cell body migration |
|  | Cell polarization factor |  | Cell body migration |
